# Supplementary material
Source: PubMed Central journal article supplement (PMC4445417)
Supplement: NIHMS197107-supplement.pdf [file NIHMS197107-supplement.pdf]

# Web-based supplementary materials for “A Bayesian two-part latent class model for longitudinal medical expenditure data: Assessing the impact of mental health and substance abuse parity”

by Brian Neelon, A. James O’Malley, and Sharon-Lise T. Normand

## Web Appendix: MCMC Algorithm for Latent Class Two-Part Model

We describe the MCMC algorithm for the two-part random intercept model applied in Section 5. As in Section 5, we assume the same predictors,  $\mathbf{X}$ , for both the binomial and lognormal components.

Starting with initial values for model parameters, the algorithm iterates through the following steps until convergence (as determined by MCMC diagnostics):

1. **Update  $\gamma_k$ :** The full conditional for  $r$ -dimensional vector  $\gamma_k$  ( $k = 2, \dots, K$ ) is given by

$$\begin{aligned} \pi(\gamma_k | \cdot) &\propto \prod_{i=1}^n [\Pr(C_i = k | \gamma_k)]^{I_{(C_i=k)}} \pi(\gamma_k) \\ &= \prod_{i: C_i=k} \left( \frac{e^{\mathbf{w}'_i \gamma_k}}{\sum_{h=1}^K e^{\mathbf{w}'_i \gamma_h}} \right) N_r[\gamma_k; \mathbf{0}, (9/4)\mathbf{I}_r], \end{aligned}$$

where  $N_r(\gamma_k; \cdot)$  is an  $r$ -dimensional normal distribution evaluated at  $\gamma_k$ . Since this full conditional distribution does not have a closed form, we update  $\gamma_k$  as a vector using a random walk Metropolis algorithm based on a multivariate- $t_3(s_g \mathbf{T}_k)$  proposal density centered at the previous value,  $\gamma_k^{old}$ . To improve mixing, we apply the adaptive proposal (AP) developed by Harrio et al. (2005), which uses the empirical covariance from an extended burn-in period to tune  $\mathbf{T}_k$  so that it emulates the true posterior covariance. The parameter  $s_g$  scales the covariance to achieve an optimal acceptance rate of approximately 20%. As a default value, we choose  $s_g = 2.4/\sqrt{r}$  as recommended by Gelman, Roberts, and Gilks (1996).

2. **Update  $C_i$ :** For  $i = 1, \dots, n$ , draw  $C_i$  from its full conditional

$$\begin{aligned} \pi(C_i | \cdot) &= \Pr(C_i = k | \cdot) = \text{Cat}(p_{ik}), \text{ where} \\ p_{ik} &= \frac{\pi_{ik}(\gamma_k) \left[ \prod_{j=1}^{n_i} f(y_{ij} | \alpha_k, \beta_k, \mathbf{b}_i, \tau_k^2) \right] N_2(\mathbf{b}_i; \mathbf{0}, \Sigma_k)}{\sum_{h=1}^K \pi_{ih}(\gamma_h) \left[ \prod_{j=1}^{n_i} f(y_{ij} | \alpha_h, \beta_h, \mathbf{b}_i, \tau_h^2) \right] N_2(\mathbf{b}_i; \mathbf{0}, \Sigma_h)}, \end{aligned}$$

$\pi_{ik}(\gamma) = \Pr(C_i = k | \gamma_k)$  as given in step (1), and  $\mathbf{b}_i = (b_{1i}, b_{2i})'$ . If there are no class-membership covariates [i.e.,  $r = 1$  in Step (1)], then update  $\pi_k$  directly from a Dirichlet( $n_1 + e_1, \dots, n_K + e_K$ ) distribution, where  $e_1, \dots, e_K$  are prior hyperparameters and  $n_k = \sum_{i=1}^n I_{(C_i=k)}$ .

To avoid label switching in this case, Lenk and DeSarbo (2000) recommend sampling from an ordered Dirichlet distribution with  $\pi_1 < \pi_2 < \dots < \pi_K$ . See Appendix C of their paper for details.

3. **Update  $\alpha_k$ :** First, consider a probit link for the binomial component of equation (1). Note that  $\Pr(y_{ij} > 0 | C_i = k, \alpha_k, b_{1i}) = \Phi(\mathbf{x}'_{ij}\alpha_k + b_{1i})$  is equivalent to assuming  $y_{ij} = I_{(u_{ij} > 0)}$ , where  $[u_{ij} | C_i = k, \alpha_k, b_{1i}] \sim N(\mathbf{x}'_{ij}\alpha_k + b_{1i}, 1)$  for all  $i, j$  such that  $C_i = k$ . To update  $\alpha_k$ , we employ the data-augmentation algorithm described in Albert and Chib (1993) by first drawing  $u_{ij}$  from its full conditional

$$\pi(u_{ij} | y_{ij}, C_i = k, \alpha_k, b_{1i}) = N(\mathbf{x}'_{ij}\alpha_k + b_{1i}, 1) \text{ truncated below (above) by } 0 \text{ for } y_{ij} > 0 (y_{ij} = 0),$$

and then drawing  $\alpha_k$  from its full conditional  $\pi(\alpha_k | \mathbf{u}_k, \mathbf{b}_{1k}) = N_p(\boldsymbol{\eta}_{\alpha_k}, \mathbf{V}_{\alpha_k})$ , where

$$\begin{aligned} \mathbf{V}_{\alpha_k} &= (\boldsymbol{\Sigma}_{\alpha}^{-1} + \mathbf{X}'_k \mathbf{X}_k)^{-1} \text{ and} \\ \boldsymbol{\eta}_{\alpha_k} &= \mathbf{V}_{\alpha_k} [\boldsymbol{\Sigma}_{\alpha}^{-1} \boldsymbol{\mu}_{\alpha} + \mathbf{X}'_k (\mathbf{u}_k - \mathbf{b}_{1k})]. \end{aligned}$$

Here,  $\boldsymbol{\mu}_{\alpha}$  and  $\boldsymbol{\Sigma}_{\alpha}$  denote the prior mean and variance of  $\alpha_k$  (for the FEHB study, we optionally assume the same prior hyperparameters for all classes);  $\mathbf{u}_k$  denotes an  $N_k \times 1$  vector of  $\{u_{ij}\}$  draws for the  $N_k$  observations in class  $k$ ;  $\mathbf{b}_{1k}$  denotes an  $N_k \times 1$  concatenated vector of component-1 random intercepts for class  $k$  (i.e.,  $b_{1i}$  is repeated  $n_i$  times for subject  $i \in$  class  $k$ ); and  $\mathbf{X}_k$  is an  $N_k \times p$  design matrix for class  $k$ .

For a logit link, one can use a similar data-augmentation approach, approximating the underlying logistic distribution by a mixture of normals as described in Frühwirth-Schnatter and Frühwirth (2007). Alternatively, a Metropolis-Hastings step can be used to update  $\alpha_k$ .

4. **Update  $\beta_k$ :** Let  $\mathbf{y}_k^*$  denote the  $M_k \times 1$  subvector of positive (i.e., nonzero) observations in class  $k$ , let  $\mathbf{X}_k^*$  denote the corresponding design matrix, and let  $\mathbf{b}_{2k}^*$  denote an  $M_k \times 1$  concatenated vector of component-2 random intercepts restricted to observations greater than zero. Assuming a  $N(\boldsymbol{\mu}_{\beta}, \boldsymbol{\Sigma}_{\beta})$ , the full conditional for  $\beta_k$  is

$$\pi(\beta_k | \cdot) = \pi(\beta_k | \mathbf{y}_k^*, \mathbf{b}_{2k}^*, \tau_k^{-2}) = N_p(\boldsymbol{\eta}_{\beta_k}, \mathbf{V}_{\beta_k}),$$

where

$$\begin{aligned} \mathbf{V}_{\beta_k} &= \left[ \boldsymbol{\Sigma}_{\beta}^{-1} + \tau_k^{-2} (\mathbf{X}_k^{*'} \mathbf{X}_k^*) \right]^{-1} \text{ and} \\ \boldsymbol{\eta}_{\beta_k} &= \mathbf{V}_{\beta_k} \left\{ \boldsymbol{\Sigma}_{\beta}^{-1} \boldsymbol{\mu}_{\beta} + \tau_k^{-2} \mathbf{X}_k^{*'} [\log(\mathbf{y}_k^*) - \mathbf{b}_{2k}^*] \right\}. \end{aligned}$$

5. **Update  $\tau_k^{-2}$ :** Assuming a  $\text{Ga}(\lambda, \delta)$  prior for  $\tau_k^{-2}$ , draw  $\tau_k^{-2}$  from its full conditional

$$\begin{aligned} \pi(\tau_k^{-2} | \cdot) &= \pi(\tau_k^{-2} | \mathbf{y}_k^*, \beta_k, \mathbf{b}_{2k}^*) \\ &= \text{Ga} \left( \lambda + M_k/2, \delta + \frac{1}{2} \left[ \log(\mathbf{y}_k^*) - \mathbf{X}_k^{*'} \beta_k - \mathbf{b}_{2k}^* \right]' \left[ \log(\mathbf{y}_k^*) - \mathbf{X}_k^{*'} \beta_k - \mathbf{b}_{2k}^* \right] \right), \end{aligned}$$

where  $M_k$ ,  $\mathbf{y}_k^*$ ,  $\mathbf{X}_k^*$ , and  $\mathbf{b}_{2k}^*$  are defined in step (4).

6. **Update  $\Sigma_k$ :**

Assuming an  $IW(\nu_0, \mathbf{D}_0)$  prior, draw  $\Sigma_k$  from its full conditional

$$\pi(\Sigma_k|\cdot) = \pi(\Sigma_k|\mathbf{b}_k) = IW(n_k + \nu_0, \mathbf{D}_0 + \mathbf{b}'_k \mathbf{b}_k),$$

where  $n_k = \sum_{i=1}^n I_{(C_i=k)}$  denotes the number of subjects currently assigned to class  $k$ , and  $\mathbf{b}_k$  is an  $n_k \times 2$  matrix with the first column containing the component-1 random intercepts and the second column containing the component-2 random intercepts for subjects in class  $k$ .

Repeat steps (3) - (6) for classes  $k = 1, \dots, K$ .

7. **Update  $\mathbf{b}_i$ :** The full conditional for  $\mathbf{b}_i = (b_{1i}, b_{2i})'$  is

$$\pi(\mathbf{b}_i|\cdot) \propto f(\mathbf{y}_i|C_i = k, \boldsymbol{\alpha}_k, \boldsymbol{\beta}_k, \mathbf{b}_i, \tau_k^2) N_2(\mathbf{b}_i; \mathbf{0}, \Sigma_k).$$

Conditional on  $C_i = k$ , we update  $\mathbf{b}_i$  using a random walk Metropolis algorithm with a bivariate  $t_3(s_b \mathbf{R}_k)$  proposal centered at the previous value,  $\mathbf{b}_i^{old}$ . The scale matrix  $\mathbf{R}_k$  can be estimated using the inverse information matrix obtained from a frequentist fit of the model, and  $s_b$  is a scaling factor used to achieve optimal acceptance rates. Note that, given  $C_i = k$ , the acceptance ratio for updating  $\mathbf{b}_i$  is a function of the class- $k$  parameters only.

## WEB TABLES

**Web Table 1**

*Model Comparison statistics for simulation study.*

| Number of Classes        | Average DIC* (SD)        | $\Delta^\dagger$ | DIC Value <sup>‡</sup> |                 |        |                        |
|--------------------------|--------------------------|------------------|------------------------|-----------------|--------|------------------------|
|                          |                          |                  | Lowest                 | 2 <sup>nd</sup> | Lowest | 3 <sup>rd</sup> Lowest |
| One Class                | 14205.12 (388.84)        | —                | 0                      | 3               | 82     | 15                     |
| Two Class                | 13641.52 (516.62)        | 563.60           | 0                      | 97              | 3      | 0                      |
| Three Class (True Model) | <b>13330.95</b> (372.33) | 310.57           | 100                    | 0               | 0      | 0                      |
| Four Class               | 14572.18 (694.65)        | -1241.23         | 0                      | 0               | 15     | 85                     |

\* Average DIC across 100 simulated datasets.

† Change in average DIC from previous model.

‡ Number of simulations in which model had lowest (most preferred) to highest (least preferred) DIC value.

Bold = lowest average DIC.

**Web Table 2**

*Summary statistics for three-class model based on 100 simulated datasets.*

| Class (%) <sup>*</sup> | Model Component                    | Parameter<br>(Variable Name)            | True Value | Mean Posterior Estimate <sup>†</sup> (SD) | 95% Coverage |
|------------------------|------------------------------------|-----------------------------------------|------------|-------------------------------------------|--------------|
| 1 (31%)                | <b>Binomial</b>                    | $\alpha_{11}$ (Intercept)               | 0.25       | 0.20 (0.21)                               | 0.94         |
|                        |                                    | $\alpha_{12}$ (Linear Time)             | 0.50       | 0.51 (0.07)                               | 0.95         |
|                        | <b>Lognormal</b>                   | $\beta_{11}$ (Intercept)                | 3.25       | 3.23 (0.14)                               | 0.94         |
|                        |                                    | $\beta_{12}$ (Linear Time)              | -0.75      | -0.75 (0.02)                              | 0.94         |
|                        | <b>Variance Components</b>         | $\tau_1^2$ (Lognormal Variance)         | 0.50       | 0.50 (0.02)                               | 0.96         |
|                        |                                    | $\sigma_{11}^2$ (Var[ $b_{1i}$ ])       | 2.00       | 2.27 (0.86)                               | 0.96         |
|                        |                                    | $\sigma_{12}^2$ (Var[ $b_{2i}$ ])       | 2.00       | 2.03 (0.25)                               | 0.94         |
|                        |                                    | $\rho_1$ (Corr[ $b_{1i}, b_{2i}$ ])     | 0.25       | 0.26 (0.15)                               | 0.91         |
|                        |                                    |                                         |            |                                           |              |
| 2 (26%)                | <b>Binomial</b>                    | $\alpha_{21}$ (Intercept)               | 0.50       | 0.57 (0.16)                               | 0.95         |
|                        |                                    | $\alpha_{22}$ (Linear Time)             | -0.50      | -0.51 (0.05)                              | 0.99         |
|                        | <b>Lognormal</b>                   | $\beta_{21}$ (Intercept)                | 2.25       | 2.25 (0.16)                               | 0.96         |
|                        |                                    | $\beta_{22}$ (Linear Time)              | 2.25       | 1.25 (0.06)                               | 0.95         |
|                        | <b>Variance Components</b>         | $\tau_2^2$ (Lognormal Variance)         | 1.00       | 1.01 (0.06)                               | 0.96         |
|                        |                                    | $\sigma_{21}^2$ (Var[ $b_{1i}$ ])       | 1.00       | 0.95 (0.30)                               | 0.93         |
|                        |                                    | $\sigma_{22}^2$ (Var[ $b_{2i}$ ])       | 1.00       | 1.01 (0.25)                               | 0.94         |
|                        |                                    | $\rho_2$ (Corr[ $b_{1i}, b_{2i}$ ])     | -0.25      | -0.22 (0.18)                              | 0.98         |
|                        |                                    |                                         |            |                                           |              |
| 3 (43%)                | <b>Binomial</b>                    | $\alpha_{31}$ (Intercept)               | -0.50      | -0.51 (0.16)                              | 0.95         |
|                        |                                    | $\alpha_{32}$ (Linear Time)             | 0.50       | 0.50 (0.05)                               | 0.93         |
|                        | <b>Lognormal</b>                   | $\beta_{31}$ (Intercept)                | 0.50       | 0.49 (0.15)                               | 0.98         |
|                        |                                    | $\beta_{32}$ (Linear Time)              | 0.50       | 0.50 (0.05)                               | 0.99         |
|                        | <b>Variance Components</b>         | $\tau_3^2$ (Lognormal Variance)         | 1.50       | 1.50 (0.05)                               | 0.95         |
|                        |                                    | $\sigma_{31}^2$ (Var[ $b_{1i}$ ])       | 1.50       | 1.58 (0.26)                               | 0.94         |
|                        |                                    | $\sigma_{32}^2$ (Var[ $b_{2i}$ ])       | 0.50       | 0.52 (0.03)                               | 0.93         |
|                        |                                    | $\rho_3$ (Corr[ $b_{1i}, b_{2i}$ ])     | 0.00       | 0.03 (0.20)                               | 0.94         |
|                        |                                    |                                         |            |                                           |              |
|                        | <b>Class Membership Parameters</b> | $\gamma_{21}$ (Class 2 Intercept)       | -0.50      | -0.55 (0.28)                              | 0.96         |
|                        |                                    | $\gamma_{22}$ (Class 2 Covariate, $w$ ) | 0.50       | 0.52 (0.32)                               | 0.94         |
|                        |                                    | $\gamma_{31}$ (Class 3 Intercept)       | 0.75       | 0.82 (0.24)                               | 0.92         |
|                        |                                    | $\gamma_{32}$ (Class 3 Covariate, $w$ ) | -0.75      | -0.78 (0.28)                              | 0.92         |

<sup>\*</sup> Estimated class proportions averaged across the 100 simulated datasets. True proportions are 0.31, 0.26 and 0.43.

<sup>†</sup> Posterior means averaged across the 100 simulated datasets.

WEB FIGURES

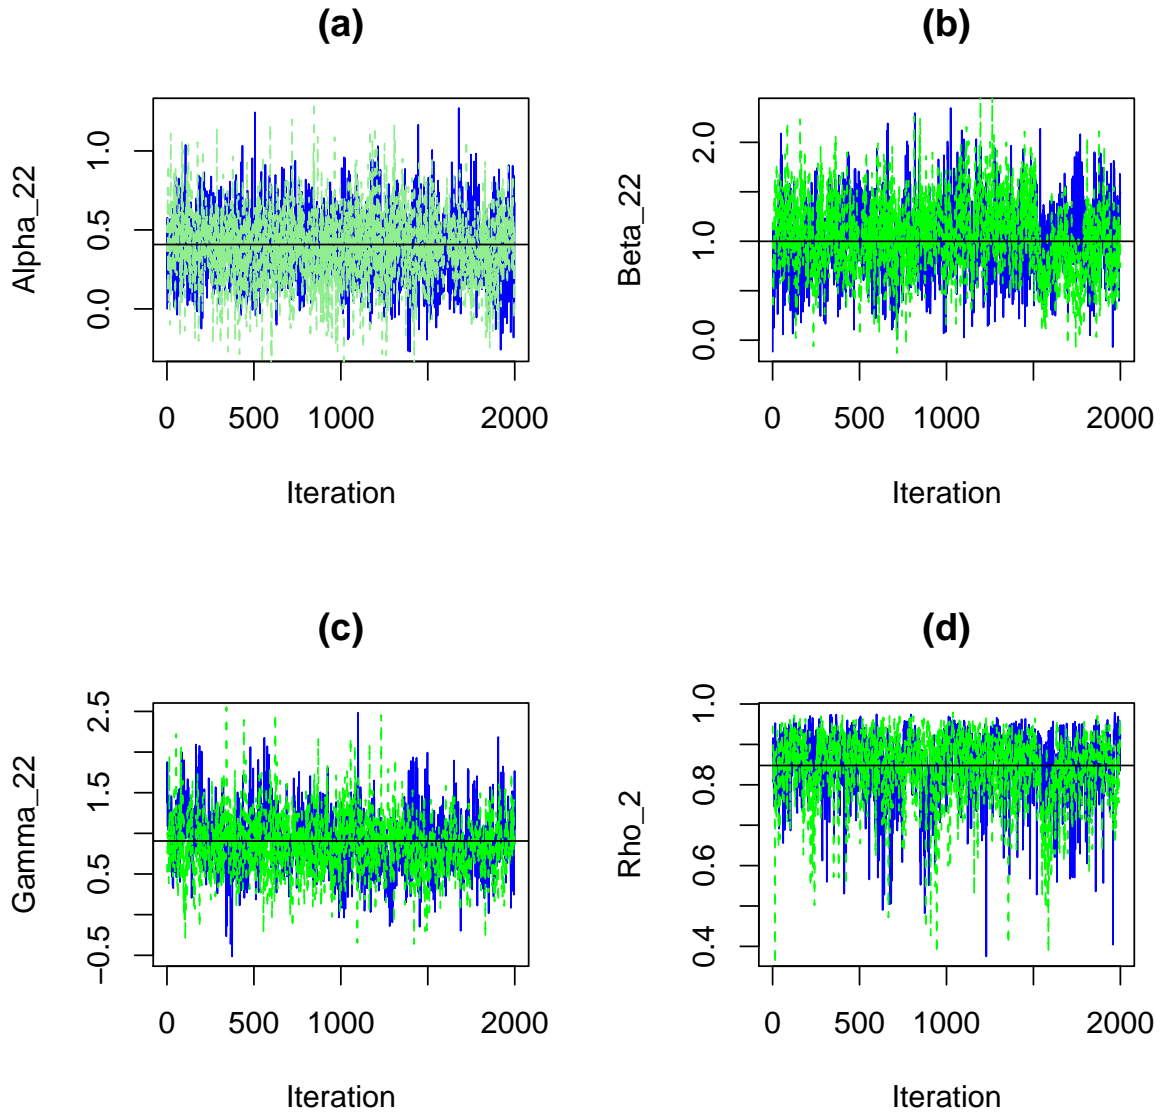

**Web Figure 1.** Trace plots based on two MCMC chains for four representative parameters from the three-class correlated model: (a)  $\alpha_{22}$  (log odds use for year 2, class 2); (b)  $\beta_{22}$  (log-spending for year 2, class 2); (c)  $\gamma_{22}$  (log-odds class-2 membership, females vs. males); (d)  $\rho_2$  (random effect correlation, class 2). Horizontal lines denote posterior means.

(a)

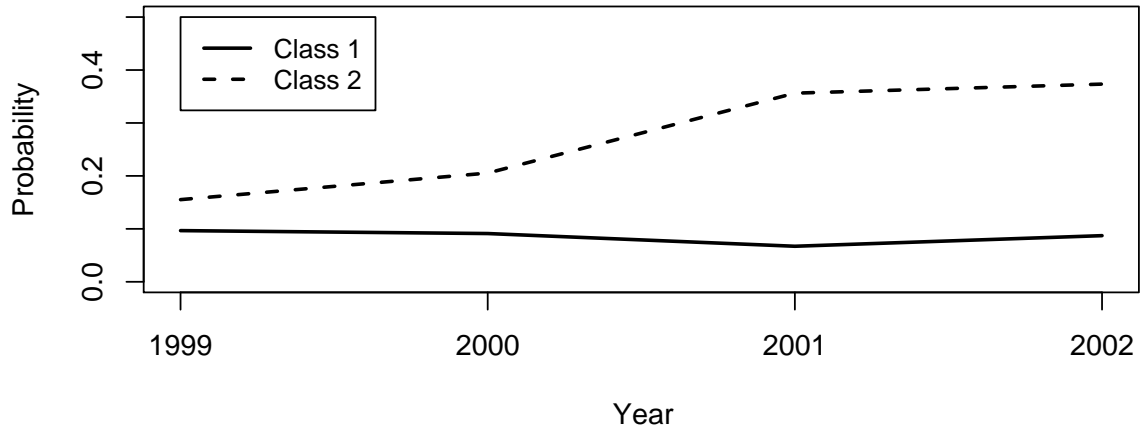

(b)

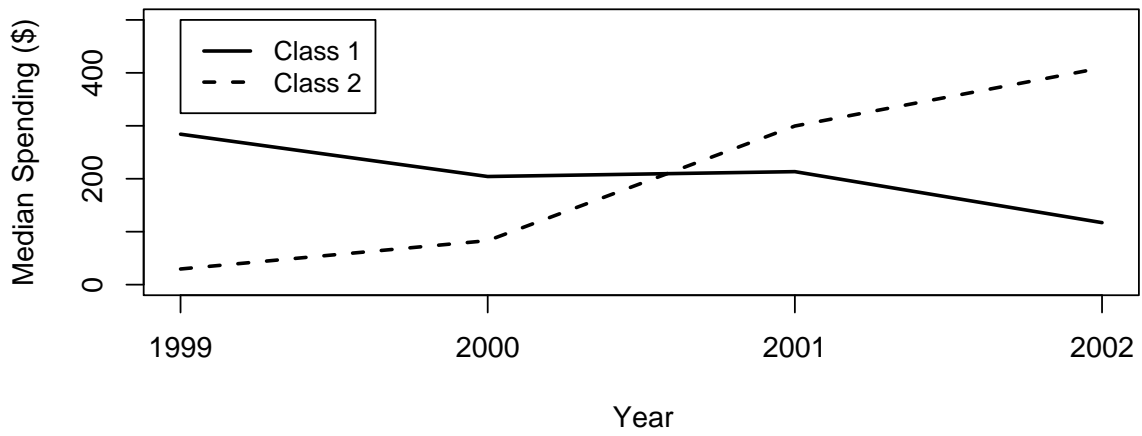

Web Figure 2. Enlarged view of classes 1 and 2 posterior trajectories.

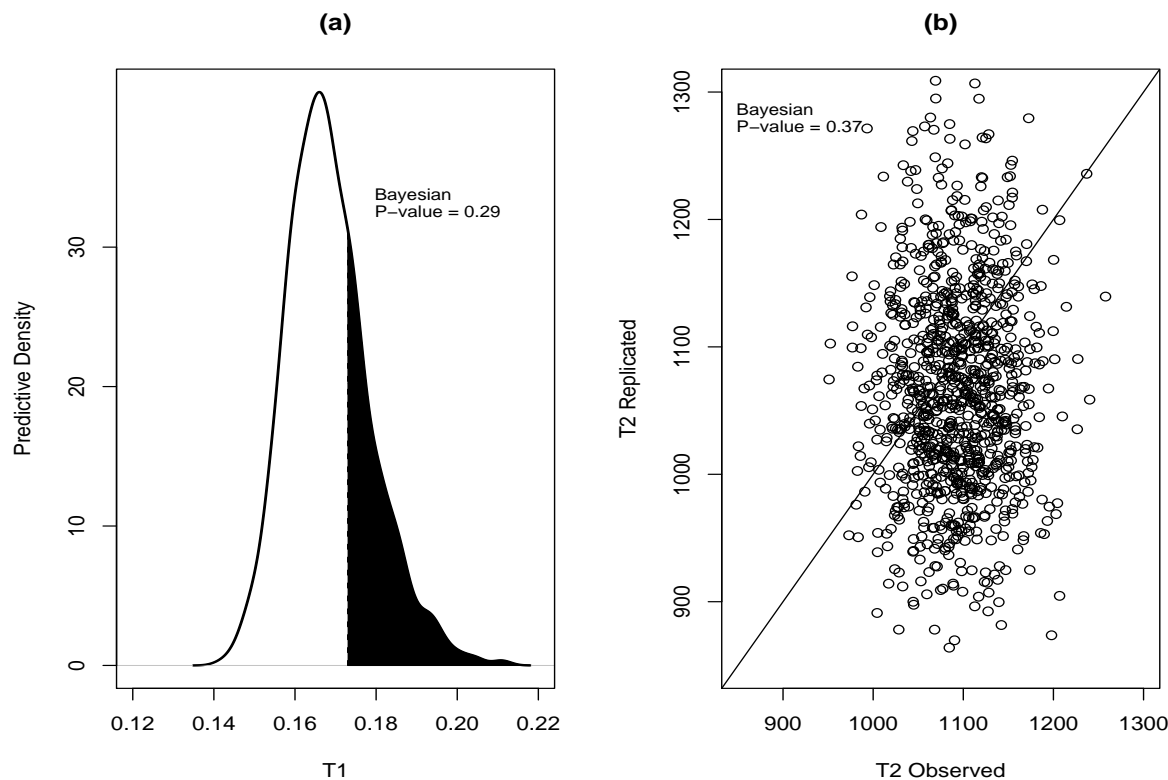

**Web Figure 3.** Results from posterior predictive checks: (a) posterior distribution of the proportion of nonzero observations; (b) scatterplot of predicted versus observed chi-square discrepancy measure across MCMC samples. In figure (a), the Bayesian predictive p-value (0.29) represents the area in the shaded region; in figure (b), the Bayesian predictive p-value (0.37) represents the proportion of samples above the diagonal.

## References

- [1] Albert, J.H. and Chib, S. (1993). Bayesian analysis of binary and polychotomous response data. *Journal of the American Statistical Association*, **88**, 669–679.
- [2] Frühwirth-Schnatter, S. and Frühwirth, R. (2007). Auxiliary mixture sampling with applications to logistic models. *Computational Statistics & Data Analysis*, **51**, 3509–3528.
- [3] Gelman, A., Roberts, G.O., and Gilks, W.R. (1996). Efficient metropolis jumping rules. In J.M. Bernardo, J.O. Berger, A.E. Dawid, and A.F.M. Smith (eds), *Bayesian Statistics*, Volume 5, 599–607. Cambridge: Oxford University Press.
- [4] Harrio, H., Saksman, E., and Tamminen, J. (2005). Componentwise adaptation for high dimensional MCMC. *Computational Statistics* **20**, 165–273.
- [5] Lenk, P.J. and DeSarbo, W.S. (2000). Bayesian inference for finite mixtures of generalized linear models with random effects. *Psychometrika* **65**, 93–119.
